# Supplementary material for: Effectiveness of Colorectal Cancer Screening Promotion Using E-Media Decision Aids: A Systematic Review and Meta-Analysis
Source: MDPI journal article supplement (doi:10.3390/ijerph18158190), 2021-08-02
Supplement: s1 [file s1]

("colorectal·cancer"·OR·"colon·cancer"·OR·"bowel·cancer"·OR·"rectal·cancer"·OR·"colorectal·neoplas\*"·OR·"colorectal·carcinoma")·AND·("screening"·OR·"detection"·OR·"prevention"·OR·"colonoscopy"·OR·"fecal·occult·blood"·OR·"FOBT")·AND·("media"·OR·"mass·media"·OR·"electronic·media"·OR·"video")¶

**Supplementary Figure S1.** Search strategy or the medical subject heading (MeSH) keywords used.

**Supplementary Table S1.** Risk of bias assessment according to the Cochrane's risk-of-bias tools for all articles in this review.

| Article ID              | Randomizati<br>on process | Deviations from<br>intended<br>interventions | Missing outcome<br>data | Measurement of<br>the outcome | Selection of the<br>reported result | Overall Bias  |
|-------------------------|---------------------------|----------------------------------------------|-------------------------|-------------------------------|-------------------------------------|---------------|
| Article 1 <sup>a</sup>  | Low                       | Low                                          | Low                     | Low                           | Low                                 | Low           |
| Article 2 <sup>a</sup>  | Low                       | Low                                          | Low                     | Low                           | Low                                 | Low           |
| Article 3 <sup>a</sup>  | Low                       | Low                                          | Some concerns           | Low                           | Some concerns                       | Some concerns |
| Article 4 <sup>b</sup>  | Low                       | Low                                          | High risk               | Some concerns                 | Some concerns                       | High risk     |
| Article 5 <sup>a</sup>  | Low                       | Low                                          | Low                     | Low                           | Low                                 | Low           |
| Article 6 <sup>a</sup>  | Low                       | Low                                          | Some concerns           | Low                           | Low                                 | Some concerns |
| Article 7 <sup>a</sup>  | Low                       | Low                                          | Some concerns           | Low                           | Low                                 | Some concerns |
| Article 8 <sup>a</sup>  | Low                       | Low                                          | Low                     | Low                           | Low                                 | Low           |
| Article 9 <sup>a</sup>  | Low                       | Low                                          | Low                     | Low                           | Low                                 | Low           |
| Article 10 <sup>a</sup> | Low                       | Low                                          | Low                     | Low                           | Low                                 | Low           |

<sup>a</sup>According to the risk-of-bias tool for randomized trials (RoB 2). <sup>b</sup>According to the risk-of-bias tool for cluster-randomized trials (RoB 2 CRT).

**Supplementary Table S2.** Risk of bias assessment according to domains using the Cochrane's risk-of-bias tool for randomized trials (RoB 2), and risk-of-bias tool for cluster-randomized trials (RoB 2 CRT).

| Adhering to<br>intervention<br>(the 'per-protocol'<br>effect) | Randomizatio<br>n process | Deviations<br>from intended<br>interventions | Missing<br>outcome data | Measurement<br>of the outcome | Selection of<br>the reported<br>result | Overall Bias |
|---------------------------------------------------------------|---------------------------|----------------------------------------------|-------------------------|-------------------------------|----------------------------------------|--------------|
| Low risk                                                      | 10                        | 10                                           | 6                       | 9                             | 8                                      | 6            |
| Some concerns                                                 | 0                         | 0                                            | 3                       | 1                             | 2                                      | 3            |
| High risk                                                     | 0                         | 0                                            | 1                       | 0                             | 0                                      | 1            |

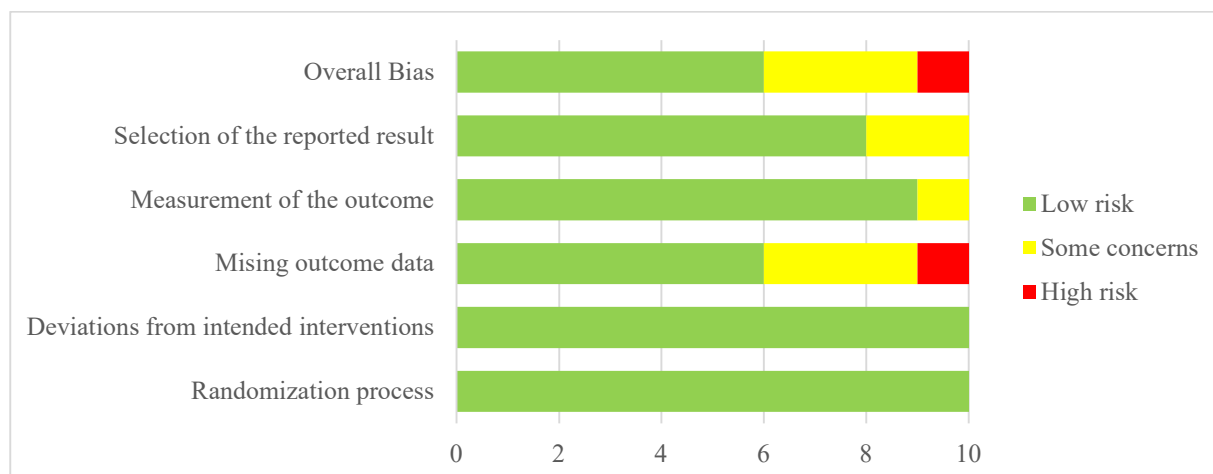

**Supplementary Figure S2.** Risk of bias assessment according to domains using the Cochrane’s risk-of-bias tool for randomized trials (RoB 2), and risk-of-bias tool for cluster-randomized trials (RoB 2 CRT). Total number of study, N = 10.

**Supplementary Table S3.** Sources of funding for all articles in this review.

| Article ID | Source of Funding                                                                                               |
|------------|-----------------------------------------------------------------------------------------------------------------|
| Article 1  | Grant from the National Cancer Institute, USA (NIH-R01-CA-158027).                                              |
| Article 2  | The New Zealand Ministry of Health with in-kind contributions from Waitematā District Health Board (12/NTA/91). |
| Article 3  | The Florida Department of Health’s Biomedical Research Branch, Bankhead Coley (4BB09).                          |
| Article 4  | The vice-chancellor for Research and Technology, Hamadan University of Medical Sciences (No. 9309184585).       |
| Article 5  | The American Cancer Society (RSG-13-165-01–CPPB).                                                               |
| Article 6  | Not stated.                                                                                                     |
| Article 7  | Not stated.                                                                                                     |
| Article 8  | The National Institutes of Health and National Cancer Institute, USA (R01CA115869).                             |
| Article 9  | The American Cancer Society (CCFDA-05-162-01).                                                                  |
| Article 10 | The Centers for Disease Control and Prevention (CDC), USA (T01 CD000146).                                       |
